# Supplementary material for: Facial Recognition Intensity in Disease Diagnosis Using Automatic Facial Recognition
Source: MDPI journal article supplement (doi:10.3390/jpm11111172), 2021-11-10
Supplement: s1 [file s1]

Supplementary Table 1. Search strategy (Medline)

| Item | Search terms                                        |
|------|-----------------------------------------------------|
| 1.   | exp facial recognition/                             |
| 2.   | (facial adj recognition).mp.                        |
| 3.   | (AI adj fac\$).mp.                                  |
| 4.   | computer-assisted, face/                            |
| 5.   | (computer adj (assisted or aided) adj fac\$).mp.    |
| 6.   | (automat\$ adj fac\$).mp.                           |
| 7.   | (machine adj learning adj fac\$).mp.                |
| 8.   | (neural adj network\$ adj fac\$).mp.                |
| 9.   | (expert adj system\$ adj fac\$).mp.                 |
| 10.  | (deep adj learning adj fac\$).mp.                   |
| 11.  | (support adj vector adj machine adj fac\$).mp.      |
| 12.  | or/1-11                                             |
| 13.  | (detect\$ or diagnos\$ or analy\$ or classif\$).mp. |
| 14.  | 12 and 13                                           |

Supplementary Table 2. Characteristics of included studies

| Study                 | Disease                    | Data sources                             | Male (%) | Diagnostic criteria  | Control selection         | Image resolution | Model/system of machine learning | Sample size of training set | Sample size of testing set | Quality (QUADAS-2)                                                                             |
|-----------------------|----------------------------|------------------------------------------|----------|----------------------|---------------------------|------------------|----------------------------------|-----------------------------|----------------------------|------------------------------------------------------------------------------------------------|
| Basel-Vanagaite 2016a | Cornelia de Lange syndrome | Children's Hospital of Philadelphia, USA | NR       | Genes mutation       | External, healthy control | NR               | FDNA                             | 131                         | 31                         | Patient selection: unclear; index test: low; reference standard: low; flow and timing: low     |
| Basel-Vanagaite 2016b | Cornelia de Lange syndrome | NR                                       | NR       | Genes mutation       | External, healthy control | NR               | NR                               | 1378                        | 17                         | Patient selection: unclear; index test: low; reference standard: low; flow and timing: low     |
| Chen 2018             | Turner syndrome            | PUMCH, Beijing, China                    | 0        | Karyotype            | Internal, other diseases  | 640 × 640        | SVM                              | 64                          | 64                         | Patient selection: high; index test: low; reference standard: low; flow and timing: low        |
| E. Miller 2011        | Acromegaly                 | Manchester, UK and Lexington, KY         | NR       | Previously treatment | External, other diseases  | NR               | SVM                              | 200                         | 49                         | Patient selection: high; index test: low; reference standard: unclear; flow and timing: low    |
| Gurovich 2019a        | Cornelia de Lange syndrome | Casia-Web-Face                           | NR       | Genes mutation       | External, healthy control | 100×100          | DCNN                             | 1693                        | 32                         | Patient selection: unclear; index test: low; reference standard: low; flow and timing: unclear |

|                |                                                                  |                                                       |       |                                 |                           |         |                               |      |     |                                                                                                 |
|----------------|------------------------------------------------------------------|-------------------------------------------------------|-------|---------------------------------|---------------------------|---------|-------------------------------|------|-----|-------------------------------------------------------------------------------------------------|
| Gurovich 2019b | Angelman syndrome                                                | Casia-Web-Face                                        | NR    | Karyotype                       | External, healthy control | 100×100 | DCNN                          | 3465 | 25  | Patient selection: unclear; index test: low; reference standard: low; flow and timing: low      |
| Kong 2018      | Acromegaly                                                       | Several large general hospitals in China and SCUT-FBP | 0.518 | Growth hormone suppression test | External, other diseases  | 100×100 | LM, KNN, SVM, RT, CNN, and EM | 1123 | 242 | Patient selection: high; index test: low; reference standard: low; flow and timing: high        |
| Kong 2020      | Acromegaly                                                       | CASIAWeb-Face                                         | 0.527 | NR                              | External, other diseases  | 160×160 | OpenCV                        | 1911 | 79  | Patient selection: high; index test: low; reference standard: unclear; flow and timing: low     |
| Kosilek 2013   | Cushing's syndrome                                               | CASIAWeb-Face                                         | 0     | Biochemistry                    | Internal, other diseases  | NR      | NR                            | 60   | 60  | Patient selection: high; index test: low; reference standard: low; flow and timing: low         |
| Ozdemir 2018a  | Fragile X, Hurler, Prader Willi, Down, Wolf Hirschhorn syndromes | Available on the Web pages                            | NR    | NR                              | Internal, healthy control | 155×172 | Hierarchical decision tree    | 130  | 30  | Patient selection: high; index test: low; reference standard: unclear; flow and timing: unclear |

|                  |                                                                  |                                           |       |           |                           |            |      |     |     |                                                                                                 |
|------------------|------------------------------------------------------------------|-------------------------------------------|-------|-----------|---------------------------|------------|------|-----|-----|-------------------------------------------------------------------------------------------------|
| Ozdemir 2018b    | Fragile X, Hurler, Prader Willi, Down, Wolf Hirschhorn syndromes | Available on the Web pages                | NR    | NR        | Internal, healthy control | 155×172    | k-NN | 130 | 30  | Patient selection: high; index test: low; reference standard: unclear; flow and timing: unclear |
| Ozdemir 2018c    | Fragile X, Hurler, Prader Willi, Down, Wolf Hirschhorn syndromes | Available on the Web pages                | NR    | NR        | Internal, healthy control | 155×172    | NR   | 130 | 30  | Patient selection: high; index test: low; reference standard: unclear; flow and timing: unclear |
| Popp 2019        | Cushing's syndrome                                               | Munich and Berlin-Charlottenburg, Germany | 0.268 | NR        | Internal, other diseases  | 1500 ×1000 | FIDA | 180 | 180 | Patient selection: high; index test: low; reference standard: low; flow and timing: low         |
| Saraydemir 2012a | Down syndrome                                                    | Istanbul, Turkey                          | 0.600 | Karyotype | Internal, other diseases  | 320×240    | k-NN | 30  | 30  | Patient selection: high; index test: low; reference standard: low; flow and timing: low         |
| Saraydemir 2012b | Down syndrome                                                    | Istanbul, Turkey                          | 0.600 | Karyotype | Internal, other diseases  | 320×240    | SVM  | 30  | 30  | Patient selection: high; index test: low; reference standard: low; flow and timing: low         |

|                |                                         |                                                                          |       |                                                    |                           |         |                  |      |     |                                                                                             |
|----------------|-----------------------------------------|--------------------------------------------------------------------------|-------|----------------------------------------------------|---------------------------|---------|------------------|------|-----|---------------------------------------------------------------------------------------------|
| Schneider 2011 | Acromegaly                              | Munich, Germany                                                          | 0.491 | Experts                                            | Internal, other diseases  | 168×224 | NR               | 116  | 116 | Patient selection: high; index test: low; reference standard: low; flow and timing: low     |
| Valentine 2017 | Fetal alcohol spectrum disorders (FASD) | FASER database                                                           | NR    | Maternal interviews and neuropsychological testing | Internal, other diseases  | NR      | FDNA             | 139  | 139 | Patient selection: high; index test: low; reference standard: low; flow and timing: low     |
| Zhao 2013a     | Down syndrome                           | Institutional Review Board (IRB) and Children's National Medical Center. | 0.662 | NR                                                 | Internal, other diseases  | 512×512 | SVM, k-NN,RF,LDA | 130  | 130 | Patient selection: high; index test: low; reference standard: low; flow and timing: unclear |
| Zhao 2013b     | 14 mixed syndromes                      | Mixed syndromes dataset                                                  | NR    | NR                                                 | Internal, healthy control | NR      | NR               | 104  | 104 | Patient selection: high; index test: low; reference standard: low; flow and timing: unclear |
| Pan 2020       | Turner syndrome                         | PUMCH, Beijing, China                                                    | 0     | Karyotype                                          | External, healthy control | 224×224 | DCNN             | 1223 | 37  | Patient selection: high; index test: low; reference standard: low; flow and timing: low     |

NR = not reported.

Supplementary Table 3. Methodological quality assessment of included studies using QUADAS-2

| <b>Study</b>          | <b>Domain<br/>1a1</b> | <b>Domain<br/>1a2</b> | <b>Domain<br/>1a3</b> | <b>Domain<br/>1b</b> | <b>Domain<br/>2a1</b> | <b>Domain<br/>2a2</b> | <b>Domain<br/>2b</b> | <b>Domain<br/>3a1</b> | <b>Domain<br/>3a2</b> | <b>Domain<br/>3b</b> | <b>Domain<br/>4a1</b> | <b>Domain<br/>4a2</b> | <b>Domain<br/>4a3</b> | <b>Domain<br/>4a4</b> |
|-----------------------|-----------------------|-----------------------|-----------------------|----------------------|-----------------------|-----------------------|----------------------|-----------------------|-----------------------|----------------------|-----------------------|-----------------------|-----------------------|-----------------------|
| Basel-Vanagaite 2016a | unclear               | low                   | low                   | low                   | low                   |
| Basel-Vanagaite 2016b | unclear               | low                   | low                   | low                   | low                   |
| Chen 2018             | unclear               | high                  | low                   | low                  | low                   | low                   | Low                  | low                   | low                   | low                  | low                   | low                   | low                   | low                   |
| E. Miller 2011        | unclear               | high                  | low                   | low                  | low                   | low                   | Low                  | unclear               | low                   | low                  | low                   | low                   | low                   | low                   |
| Gurovich 2019a        | unclear               | low                   | low                   | low                   | low                   |
| Gurovich 2019b        | unclear               | low                   | low                   | low                   | low                   |
| Kong 2018             | unclear               | high                  | low                   | low                  | low                   | low                   | Low                  | low                   | low                   | low                  | low                   | low                   | high                  | low                   |
| Kong 2020             | unclear               | low                   | low                   | low                  | low                   | low                   | Low                  | low                   | low                   | unclear              | low                   | low                   | low                   | low                   |
| Kosilek 2013          | unclear               | high                  | high                  | low                  | low                   | low                   | low                  | low                   | low                   | low                  | low                   | low                   | low                   | low                   |
| Ozdemir 2018a         | unclear               | low                   | low                   | high                 | low                   | low                   | low                  | unclear               | low                   | low                  | low                   | unclear               | low                   | low                   |
| Ozdemir 2018b         | unclear               | low                   | low                   | high                 | low                   | low                   | low                  | unclear               | low                   | low                  | low                   | unclear               | low                   | low                   |
| Ozdemir 2018c         | unclear               | low                   | low                   | high                 | low                   | low                   | low                  | unclear               | low                   | low                  | low                   | unclear               | low                   | low                   |
| Popp 2019             | unclear               | high                  | low                   | low                  | low                   | low                   | low                  | low                   | low                   | low                  | low                   | low                   | low                   | low                   |
| Saraydemir 2012a      | unclear               | high                  | low                   | low                  | low                   | low                   | low                  | low                   | low                   | low                  | low                   | low                   | low                   | low                   |
| Saraydemir 2012b      | unclear               | high                  | low                   | low                  | low                   | low                   | low                  | low                   | low                   | low                  | low                   | low                   | low                   | low                   |
| Schneider 2011        | unclear               | high                  | low                   | low                  | low                   | low                   | low                  | low                   | low                   | low                  | low                   | low                   | low                   | low                   |

|                |         |      |     |     |     |     |     |     |     |     |     |     |     |     |
|----------------|---------|------|-----|-----|-----|-----|-----|-----|-----|-----|-----|-----|-----|-----|
| Valentine 2017 | unclear | high | low |
| Zhao 2013a     | unclear | high | low |
| Zhao 2013b     | unclear | high | low |
| Pan 2020       | unclear | high | low |

---
